# Supplementary material
Source: PubMed Central journal article supplement (PMC4062575)
Supplement: NIHMS545026-supplement-01.pdf [file NIHMS545026-supplement-01.pdf]

## SUPPLEMENTARY FIGURES AND TABLES.

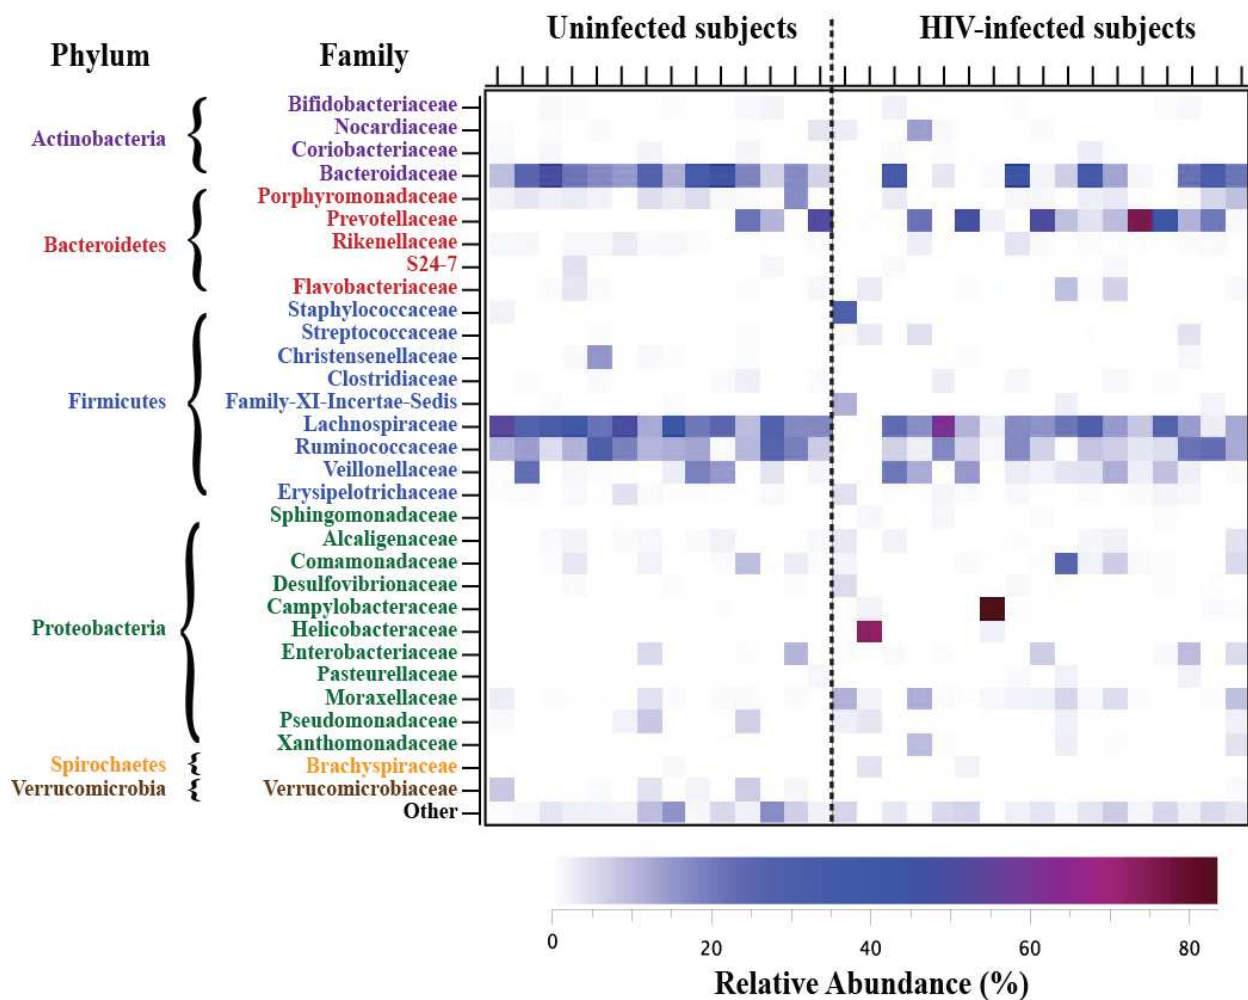

**Supplementary Figure S1. Distribution of colonic mucosal tissue-associated bacterial families in all study subjects.** Color levels indicate the abundance of each bacteria relative to total bacteria (Relative Abundance, %) in colonic mucosal tissue for each individual. Each line at the top of the box represents each uninfected (n=14) or HIV-infected (n=17) subject with the dotted line indicating separation between the two groups. Bacterial families are organized into alphabetical order based on Phylum. Any family not shown are grouped together as ‘Other’.

Supplementary Data, Materials and Methods.  
Dillon *et al.*

**Supplementary Table S1. Relative abundance of families of bacteria within colonic mucosal tissue which are statistically different in HIV-infected subjects compared to uninfected subjects**

|                              | <b>Uninfected subjects (n=14)</b> | <b>HIV-infected subjects (n=17)</b> | <b>Difference in relative abundance<sup>P value*</sup></b> |
|------------------------------|-----------------------------------|-------------------------------------|------------------------------------------------------------|
| <b>Bacteroidetes Phylum</b>  |                                   |                                     |                                                            |
| Prevotellaceae               | 0.02% (0.003-48.9%)               | 5.5% (0.01-74.7%)                   | ↑ <sup>0.03</sup>                                          |
| Porphyromonadaceae           | 2.2% (0.02-16.6%)                 | 0.2% (0-8.8%)                       | ↓ <sup>0.06</sup>                                          |
| Rickenellaceae               | 1.1% (0.002-3.1%)                 | 0.09% (0-3.9%)                      | ↓ <sup>0.05</sup>                                          |
| Bacteroidaceae               | 17.2% (6.0-46.8%)                 | 3.6 (0.04-43.8%)                    | ↓ <sup>0.04</sup>                                          |
| <b>Firmicutes Phylum</b>     |                                   |                                     |                                                            |
| Lachnospiraceae              | 24.5% (8.7-52.1%)                 | 13.6% (0.09-59.9%)                  | ↓ <sup>0.009</sup>                                         |
| Christensenellaceae          | 0.3% (0-15.2%)                    | 0.001% (0-1.5%)                     | ↓ <sup>0.04</sup>                                          |
| Ruminococcaceae              | 11.3% (0.8-29.3%)                 | 6.4% (0.02-22.0%)                   | ↓ <sup>0.04</sup>                                          |
| <b>Proteobacteria Phylum</b> |                                   |                                     |                                                            |
| Brucellaceae                 | 0% (0-0.01%)                      | 0.001% (0-0.6%)                     | ↑ <sup>0.02</sup>                                          |
| Xanthomonadaceae             | 0.008% (0-0.4%)                   | 0.04% (0-9.8%)                      | ↑ <sup>0.04</sup>                                          |
| Moraxellaceae                | 0.6% (0.06-4.2%)                  | 1.37% (0.06-11.9%)                  | ↑ <sup>0.05</sup>                                          |
| Rhodospirillaceae            | 0.01% (0-1.3%)                    | 0% (0-0.2%)                         | ↓ <sup>0.02</sup>                                          |

Values are shown as median, range with arrows indicating an increase (↑) or decrease (↓) in relative abundance in HIV-infected subjects compared to uninfected subjects. \*Statistical analysis performed using Mann-Whitney test. Italics highlight p values trending towards significant.

Supplementary Data, Materials and Methods.  
Dillon *et al.*

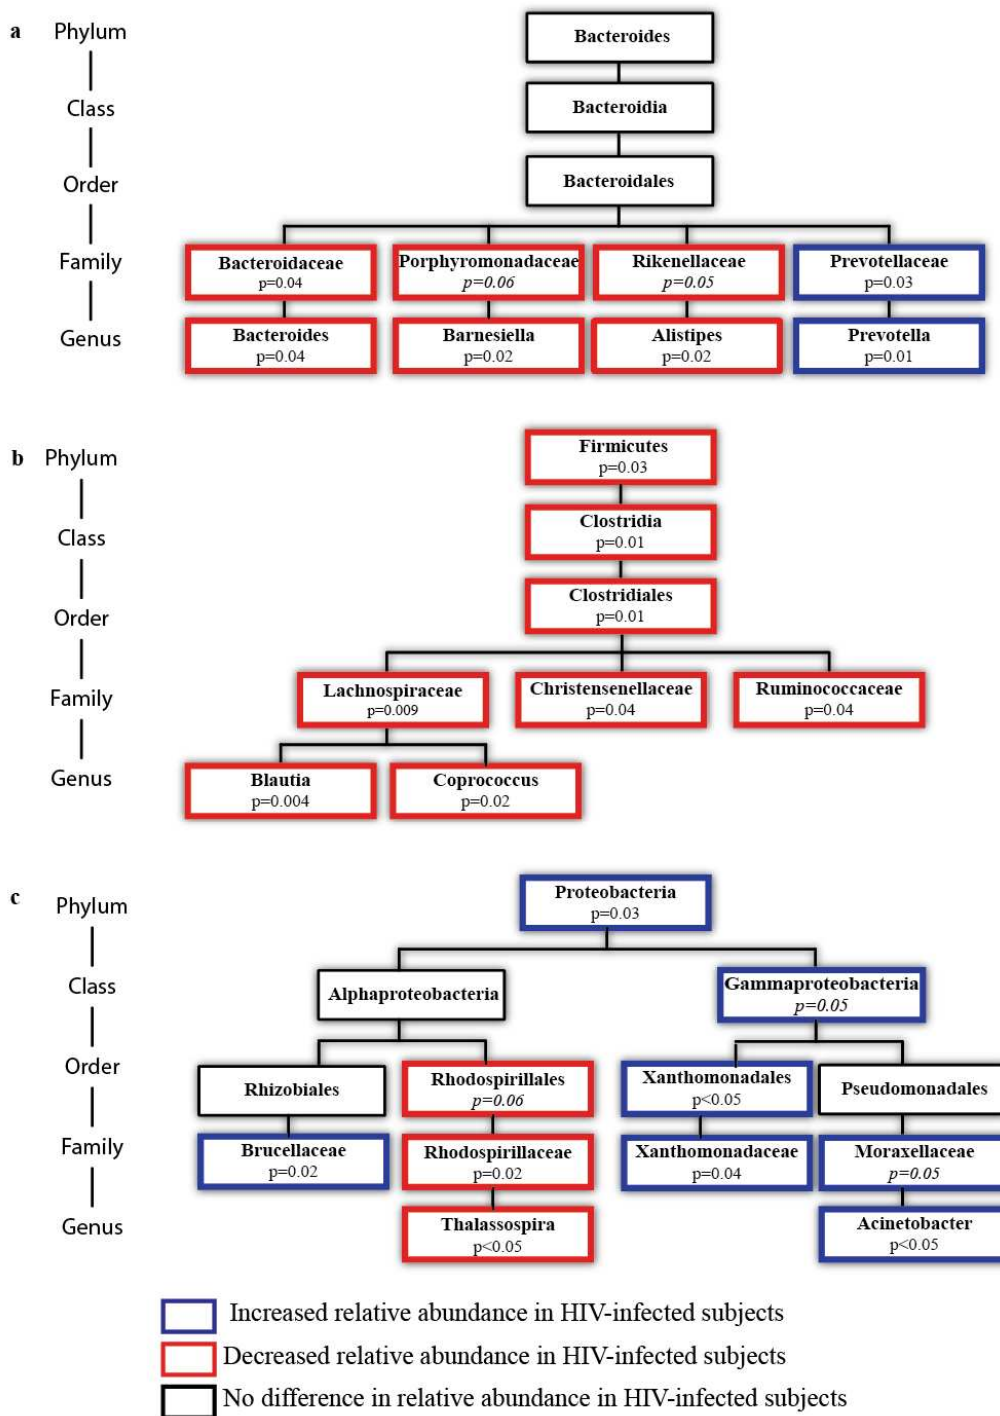

**Supplementary Figure S2. Flow chart illustrating the altered microbiota in colonic mucosal tissue of HIV-infected individuals.** These flow charts illustrate the specific bacteria that are altered in relative abundance in colonic mucosal tissue of HIV-infected subjects and their rank within the taxonomic hierarchy (Phylum, Class, Order, Family, Genus) within a) Bacteroidetes, b) Firmicutes and c) Proteobacteria phyla. Each box represents a change in the relative abundance of bacteria in HIV-infected subjects compared to uninfected subjects (blue:increase; red: decrease; black: no significant difference). Statistical analysis was performed using the Mann-Whitney test. italics: trend only.

Supplementary Data, Materials and Methods.  
Dillon *et al.*

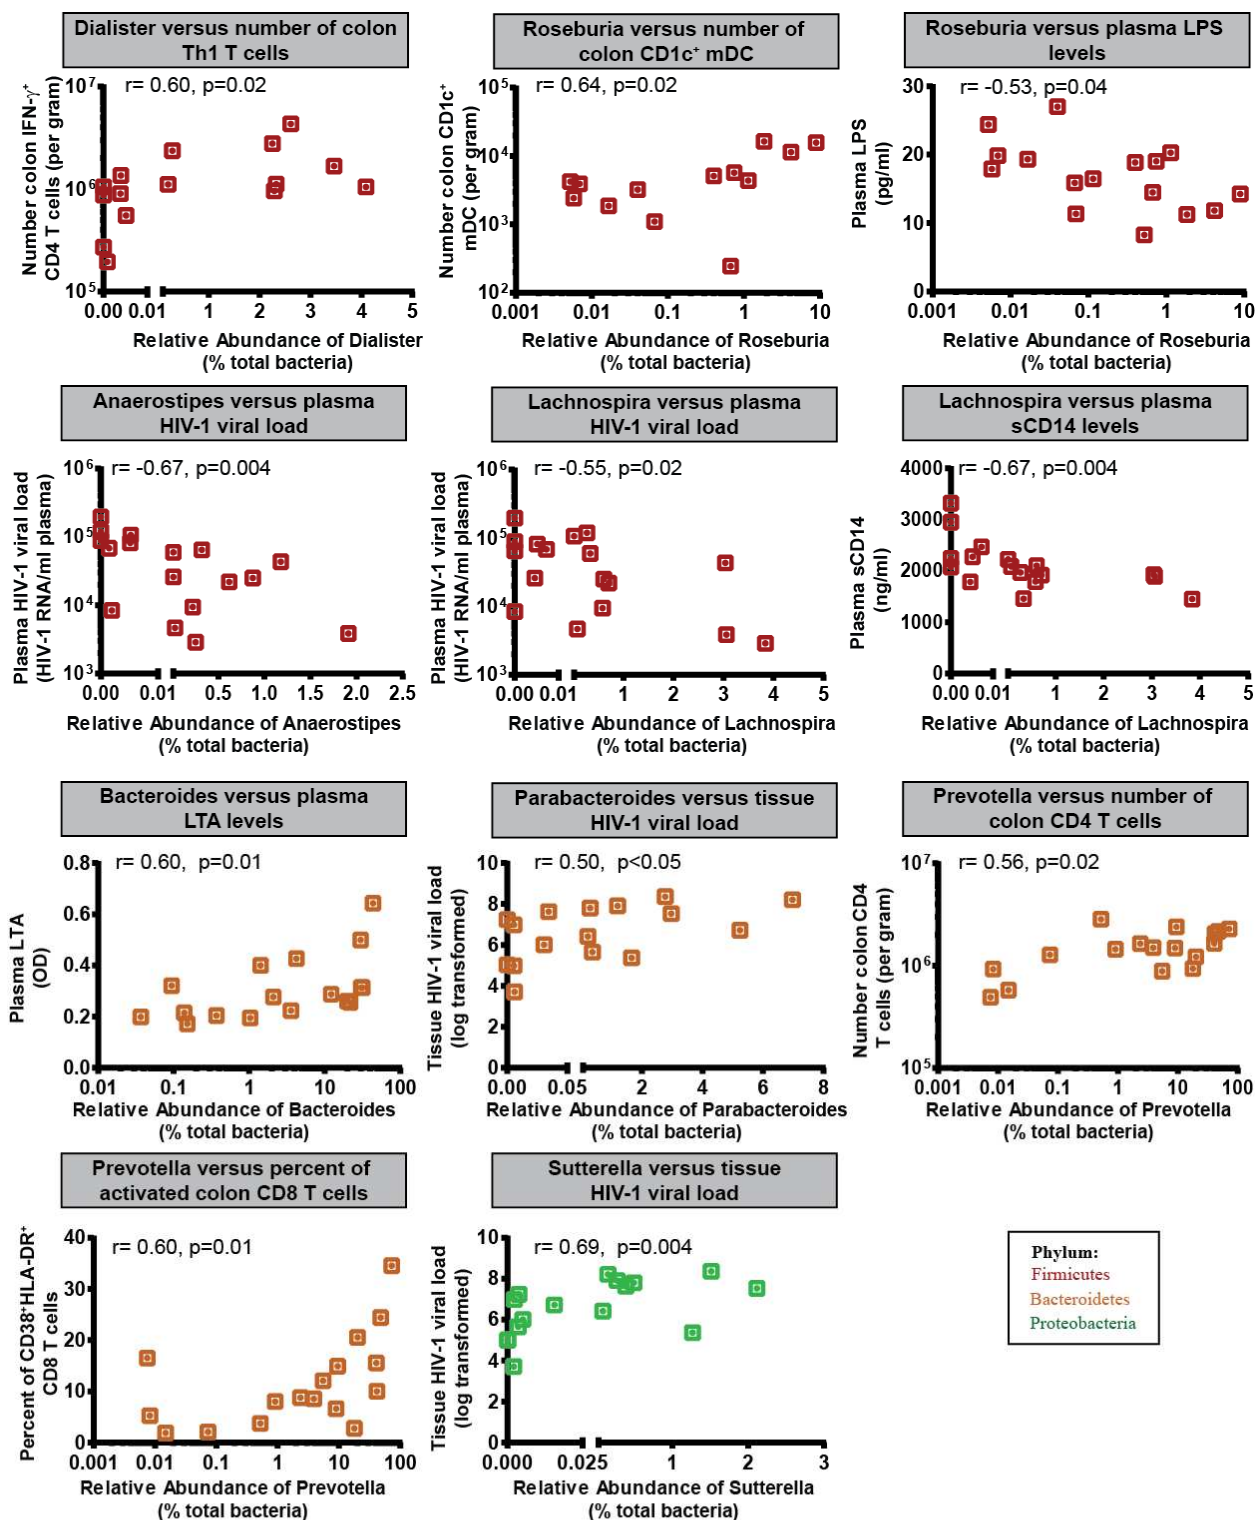

**Supplementary Figure S3. Significant associations between mucosa-associated genera and immune and virological parameters in HIV-1 infected subjects.** Cartesian graphs are shown for genera that significantly associated with immune or virological parameters as illustrated in Figure 3a. Additional associations between Prevotella and activated colon T cells and CD1c<sup>+</sup> mDC are shown in Figures 3b-c. Statistical analysis was performed using the Spearman t test.

Supplementary Data, Materials and Methods.  
Dillon *et al.*

|                                                 | Mucosal tissue                          | Fecal Aspirates                         | Stool                                   |
|-------------------------------------------------|-----------------------------------------|-----------------------------------------|-----------------------------------------|
| <b><u>Phylum</u></b>                            |                                         |                                         |                                         |
| Proteobacteria                                  | Statistically significant increase      | No statistically significant difference | No statistically significant difference |
| Firmicutes                                      | Statistically significant decrease      | Statistically significant decrease      | No statistically significant difference |
| Bacteroidetes                                   | No statistically significant difference | No statistically significant difference | No statistically significant difference |
| <b><u>Families in Proteobacteria phylum</u></b> |                                         |                                         |                                         |
| Brucellaceae                                    | Statistically significant increase      | No statistically significant difference | No statistically significant difference |
| Xanthomonadaceae                                | Statistically significant increase      | No statistically significant difference | No statistically significant difference |
| Rhodospirillaceae                               | Statistically significant decrease      | No statistically significant difference | P=0.098 (decrease)                      |
| <b><u>Genera in Proteobacteria phylum</u></b>   |                                         |                                         |                                         |
| <i>Acinetobacter</i>                            | Statistically significant increase      | No statistically significant difference | P=0.099 (increase)                      |
| <i>Thalassospira</i>                            | Statistically significant decrease      | No statistically significant difference | P=0.092 (decrease)                      |
| <b><u>Families in Firmicutes Phylum</u></b>     |                                         |                                         |                                         |
| Lachnospiraceae                                 | Statistically significant decrease      | No statistically significant difference | No statistically significant difference |
| Christensenellaceae                             | Statistically significant decrease      | No statistically significant difference | No statistically significant difference |
| Ruminococcaceae                                 | Statistically significant decrease      | P=0.08 (decrease)                       | Statistically significant decrease      |
| <b><u>Genera in Firmicutes phylum</u></b>       |                                         |                                         |                                         |
| <i>Blautia</i>                                  | Statistically significant decrease      | No statistically significant difference | No statistically significant difference |
| <i>Coprococcus</i>                              | Statistically significant decrease      | No statistically significant difference | No statistically significant difference |
| <b><u>Families in Bacteroidetes phylum</u></b>  |                                         |                                         |                                         |
| Prevotellaceae                                  | Statistically significant increase      | Statistically significant increase      | No statistically significant difference |
| Bacteroidaceae                                  | Statistically significant decrease      | Statistically significant decrease      | Statistically significant decrease      |
| <b><u>Genera in Bacteroidetes phylum</u></b>    |                                         |                                         |                                         |
| <i>Prevotella</i>                               | Statistically significant increase      | Statistically significant increase      | P=0.099 (increase)                      |
| <i>Bacteroides</i>                              | Statistically significant decrease      | Statistically significant decrease      | Statistically significant decrease      |
| <i>Barnesiella</i>                              | Statistically significant decrease      | No statistically significant difference | Statistically significant decrease      |
| <i>Alistipes</i>                                | Statistically significant decrease      | Statistically significant decrease      | Statistically significant decrease      |

Statistically significant increase in relative abundance in HIV-infected subjects compared to uninfected subjects  
 Statistically significant decrease in relative abundance in HIV-infected subjects compared to uninfected subjects  
 No statistically significant difference in relative abundance in HIV-infected subjects compared to uninfected subjects

**Supplementary Figure S4. Color-coded diagram illustrating differences in relative abundance of bacteria between HIV-infected and uninfected subjects in mucosal tissue, fecal aspirates and stool samples.** The specific phyla, families and genera shown are based on the mucosal-adherent bacteria in mucosal tissue that are considered significantly different in HIV-infected individuals compared to uninfected subjects. Statistical analysis comparing the relative abundance of bacteria in HIV-infected and uninfected subjects was performed using the Mann-Whitney test.

Supplementary Data, Materials and Methods.  
Dillon *et al.*

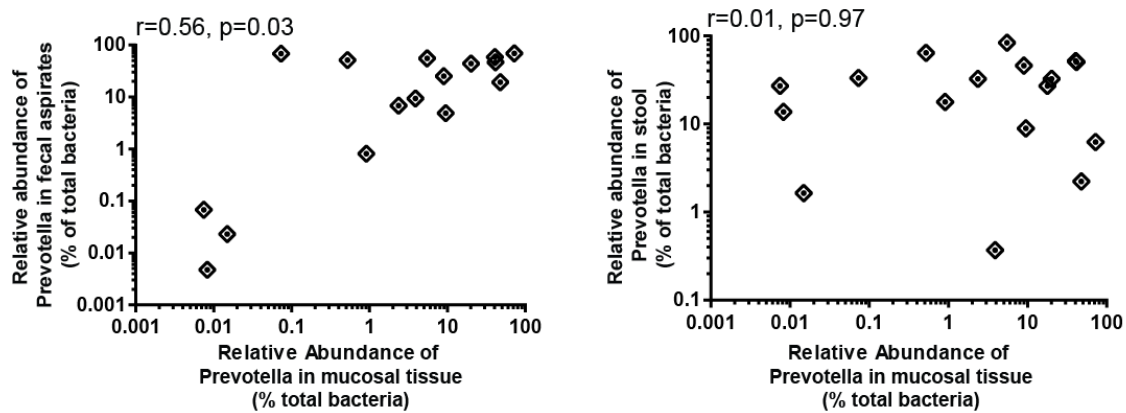

**Supplementary Figure S5: Relative abundance of mucosa-associated *Prevotella* in HIV-1 infected subjects associates with the relative abundance of *Prevotella* in fecal aspirates, but not in stool samples.** Correlations between the relative abundance of *Prevotella* in mucosal tissue and relative abundance in a) fecal aspirates (n=16) or in b) stool (rectal swabs; n=17) in HIV-1 infected subjects. Statistical analysis was performed using the Spearman t test.

Supplementary Data, Materials and Methods.  
Dillon *et al.*

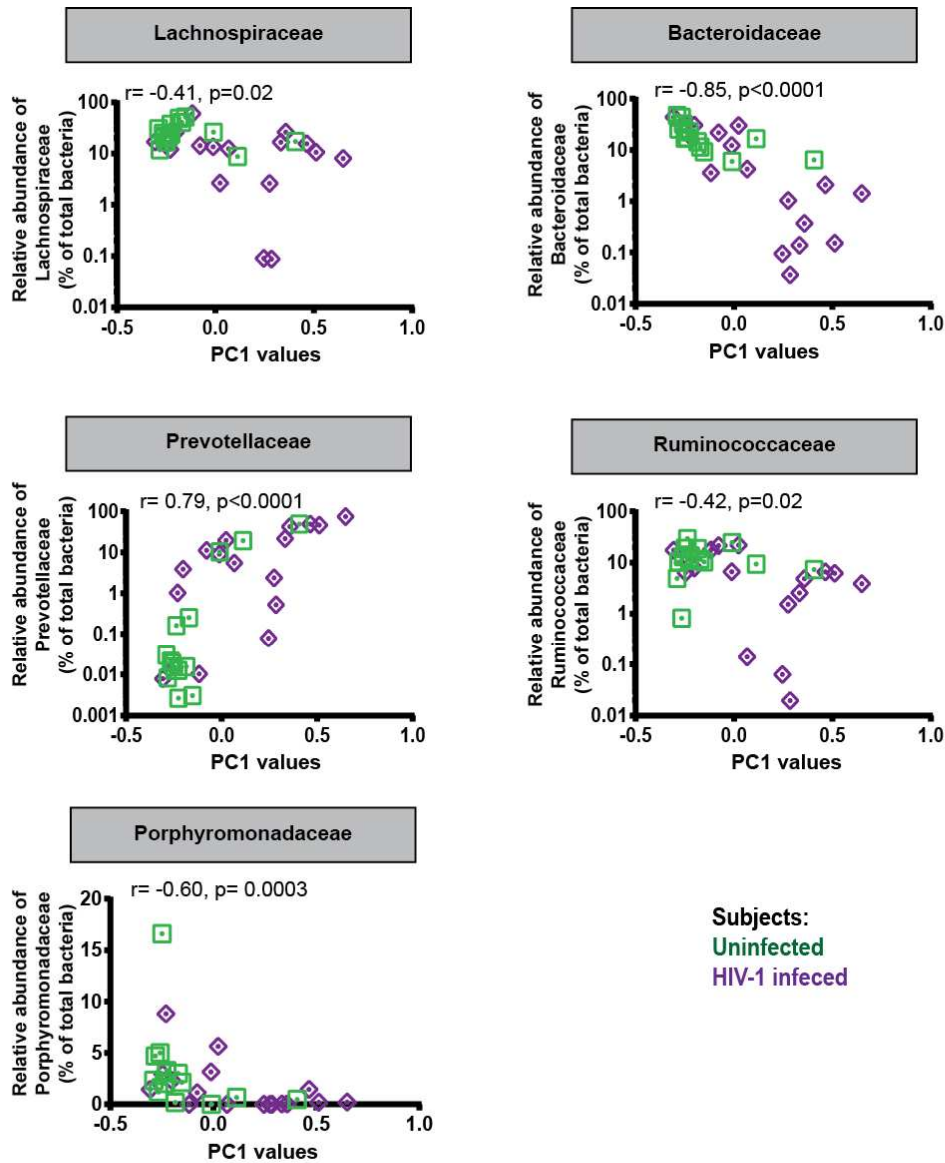

**Supplementary Figure S6. Significant associations between PC1 values and bacterial families.** Cartesian graphs are shown for bacterial families that significantly associated with PC1 values as illustrated in Figure 4d. Statistical analysis was performed using the Spearman t test.

Supplementary Data, Materials and Methods.  
Dillon *et al.*

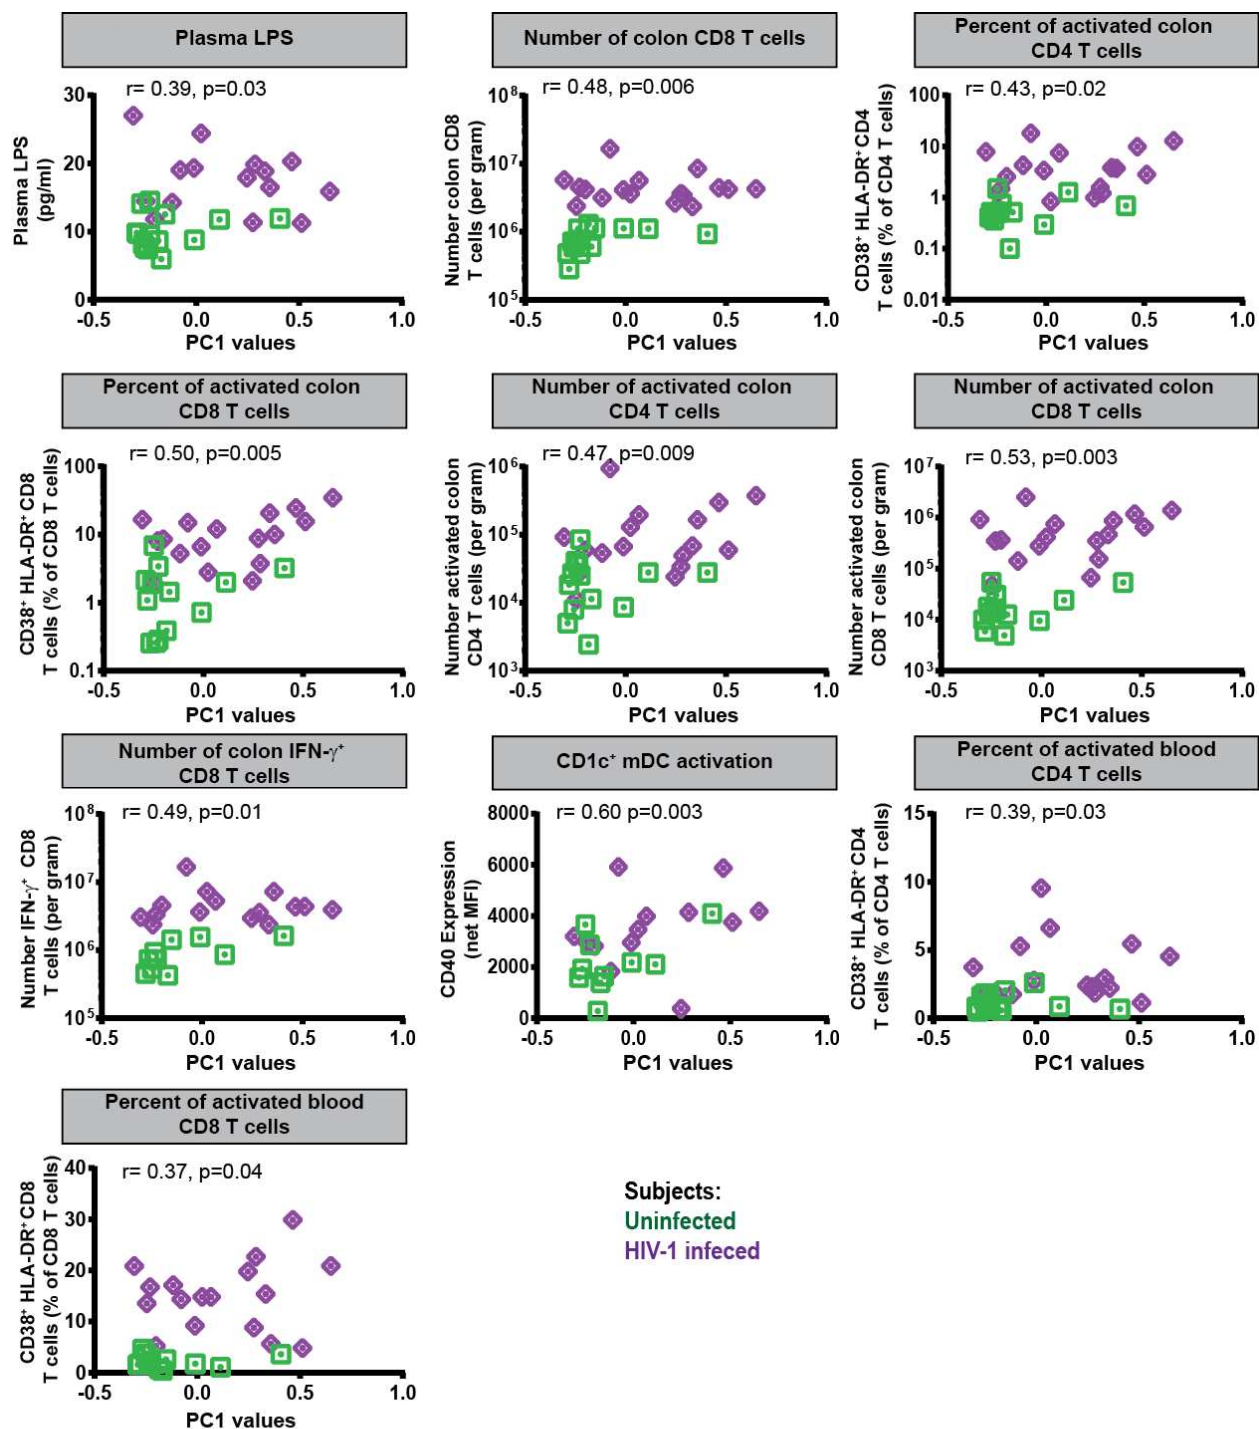

**Supplementary Figure S7. Significant associations between PC1 values and immunological parameters.** Cartesian graphs are shown for immunological parameters that significantly associated with PC1 values as illustrated in Figure 4e. Statistical analysis was performed using the Spearman t test.



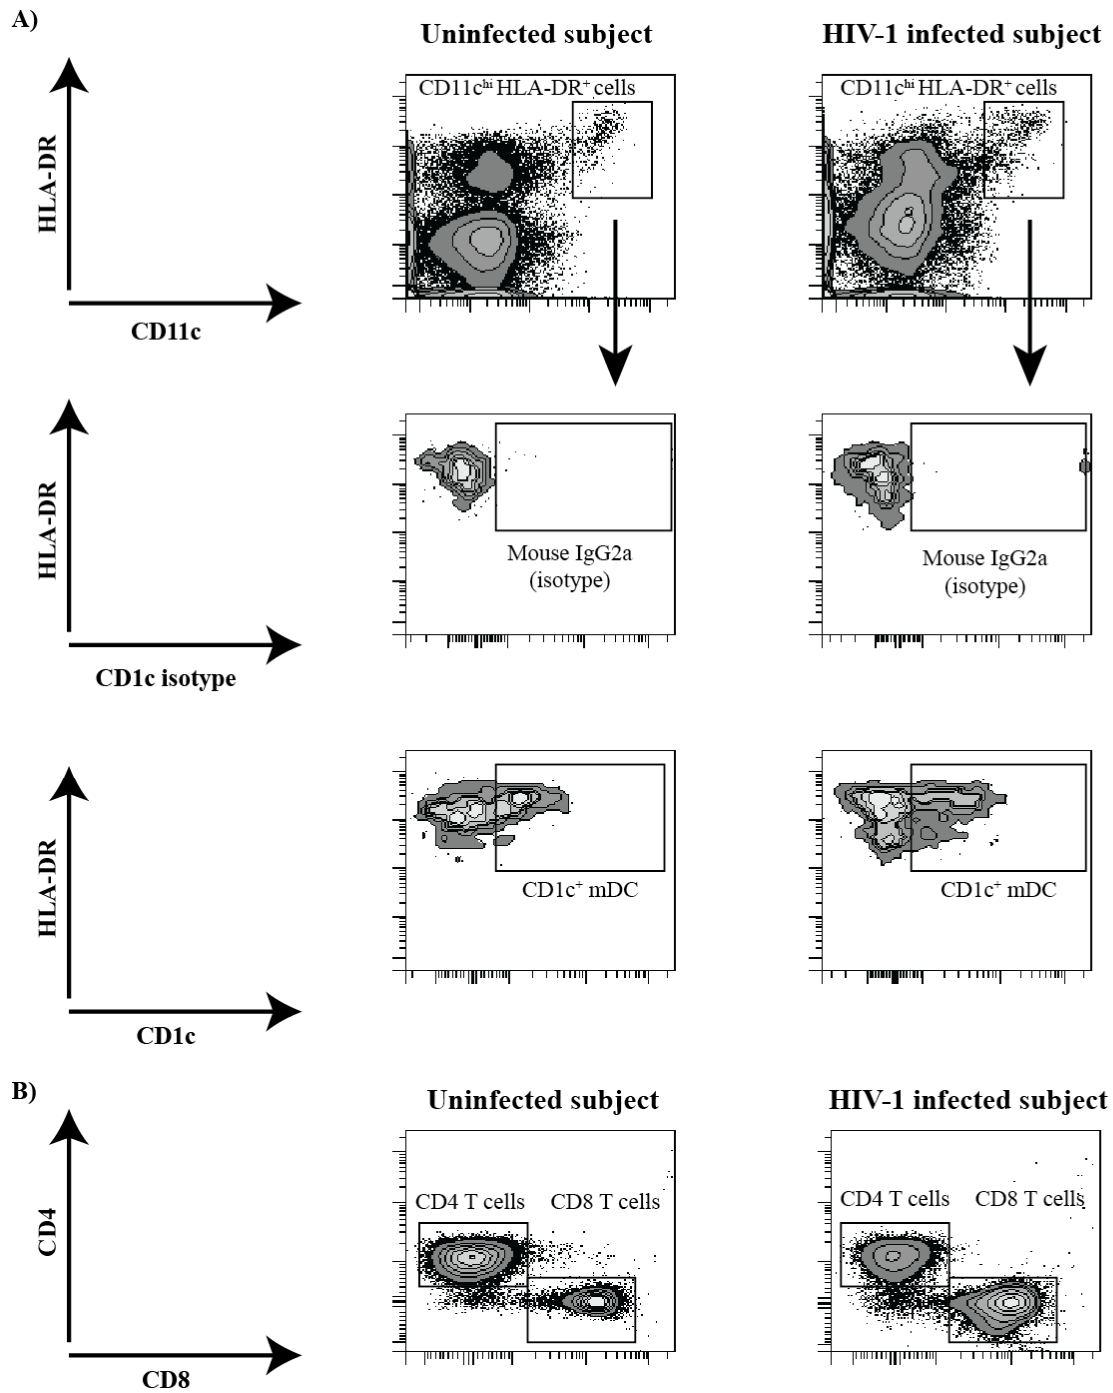

**Supplementary Figure S8. Representative flow plots illustrating colon CD1c<sup>+</sup> mDC and T cell populations in an uninfected and in an HIV-1 infected subject.** All populations were identified from viable, CD45<sup>+</sup> cells (plots not shown). A) CD1c<sup>+</sup> mDC were then identified within CD11c<sup>hi</sup> HLA-DR<sup>+</sup> cells using an isotype control. B) CD4 and CD8 T cells were identified within CD3<sup>+</sup>γδ<sup>neg</sup> T cells (not shown) to exclude CD4 and CD8-expressing γδ T cells.

## SUPPLEMENTARY MATERIALS AND METHODS

### Study exclusion criteria.

The list of exclusion criteria for HIV subjects included: 1) presence of AIDS-defining condition (WHO Criteria) within 6 months and CD4 count <200 cell/ $\mu$ l within 3 months of clinic visit, 2) HIV-1 plasma viral load <2000 copies/ml or designation as “long-term non-progressor”, 3) ART taken for more than 7 days within the past 6 months. Exclusion for all subjects included 1) medical history of bleeding disorder, 2) daily use of aspirin or NSAIDs with inability to withhold drug for 10 days, 3) medical history of rectal bleeding within the preceding year or surgical history of left-sided colonic, rectal or anal resection or anastomosis, or bleeding from prior endoscopic procedures, 4) medical history of inflammatory bowel disease, celiac disease, colitis or other intestinal inflammatory disorders, 5) any chronic or acute medical condition that would interfere with study conditions such as cancer, heart disease or diabetes, 6) acute or chronic hepatitis or treatment for viral hepatitis within the past 6 months, 7) a bacterial infection requiring antibiotic therapy within 3 months of enrollment, 8) continuous use for more than 3 days within the past 60 days of immunosuppressives, immune modulators, antineoplastic agents or probiotics, 9) vaccination of any sort within 1 week of sample collection.

### Collection and storage of samples.

Rectal swaps were collected by insertion of a sterile cotton swab into the rectum at the time of study screening (typically 2 weeks prior to flexible sigmoidoscopy procedure). Swabs were immediately stored in liquid nitrogen. On the day of the clinic visit, all subjects had been fasting for at least 12hrs and underwent an enema (Sunmark McKesson, San Francisco, CA) before the flexible sigmoidoscopy procedure. A saline rinse of the surrounding area was performed prior to the collection of the pinch biopsies (fecal aspirate). The fecal aspirate was collected into sterile tubes and stored in liquid nitrogen. The subjects underwent a flexible sigmoidoscopy using 2.3mm standard forceps. Twenty biopsies were placed in HBSS for immediate tissue digestion. Biopsies for tissue HIV-1 viral load assessment and DNA isolation were placed in RNeasy lysis buffer (Qiagen, Crawfordsville, IN) (n=4 per subject) for 20-24hrs, snap frozen and stored in liquid nitrogen. Peripheral blood samples were also processed immediately for plasma and PBMC isolation as previously described.<sup>1</sup>

### Processing of colon biopsies for single cell suspensions.

Biopsies were washed in HBSS (Cellgro, Manassas, VA) and digested in Collagenase D Treatment media consisting of RPMI (Invitrogen, Carlsbad, CA) + 2% Bovine Serum Albumin (BSA; Sigma-Aldrich, St Louis, MO ) + 1% Penicillin/Streptomycin/L-glutamine (Invitrogen, Carlsbad, CA) + 500ug/ml piperacillin/tazobactam (Zosyn; Wyeth, Madison, NY) + 1.25ug/ml amphotericin B (Fungizone; Invitrogen) + 10 $\mu$ g/ml DNase (Sigma-Aldrich) + 0.25mg/ml Collagenase D (Roche Indianapolis, IN) for 40min at 37°C with gentle rotation. Released cells were passed through a 70 $\mu$ m cell strainer and the remaining tissue washed with HBSS + 500 $\mu$ g/ml piperacillin/tazobactam + 1.25 $\mu$ g/ml amphotericin B and any additional released cells passed through the cell strainer. Collagenase-digestion and washing were performed 1-2 more times with mechanical disruption using the plunger end of a 1ml syringe until all tissue was digested. All released cells were pooled and counted with large epithelial cells and dead cells excluded.

**Collection of plasma and serum and processing of PBMC.**

Peripheral blood was collected into BD Vacutainer Blood Collection Tubes containing EDTA or Heparin (BD Biosciences; San Jose, CA) and whole blood centrifuged to isolate plasma. For serum collection, peripheral blood was collected into BD Vacutainer Blood Collection Tubes containing a clot activator (BD Biosciences) and left at RT for 60min prior to centrifugation. Plasma and serum were frozen at  $-80^{\circ}\text{C}$  in single-use aliquots. PBMC were then isolated from heparinized blood by standard Ficoll-Hypaque (GE Healthcare, Piscataway, NJ) density gradient centrifugation, cryopreserved and stored in liquid nitrogen as previously described.<sup>1-3</sup>

**Surface and intracellular flow cytometry analysis.**

All antibodies and dyes are listed in Supplementary Table S2. To identify viable, mononuclear cells and exclude epithelial cells, cells were first gated on CD45 expression and then viable cells within this population determined. CD1c<sup>+</sup> mDC were defined within an HLA-DR<sup>+</sup> CD11c<sup>hi</sup> population to exclude B cells and macrophages with specific CD1c expression determined using an isotype control (**Supplementary Figure S8**).<sup>3,4</sup> Activation was determined by evaluating the level of specific CD40 expression using an isotype control. Evaluation of CD1c<sup>+</sup> mDC frequency and degree of activation were only performed when there were at least 25 HLA-DR<sup>+</sup>CD11c<sup>+</sup>CD1c<sup>+</sup> events. CD4 and CD8 T cells were gated from within a CD3<sup>+</sup> $\gamma\delta$  TCR<sup>-</sup> population to exclude intestinal  $\gamma\delta$  T cells that express CD4 and CD8 (**Supplementary Figure S8**). To determine activated colon CD4 and CD8 T cells, the combination of antibodies was altered slightly to accommodate other fluorochrome-labeled antibodies and a specific CD4 antibody was excluded from the antibody cocktail. CD4 T cells were identified as CD3<sup>+</sup>CD8<sup>-</sup> and T cell activation evaluated by determining expression of HLA-DR in combination with CD38 or matched isotype control. Peripheral blood T cells were identified as CD3<sup>+</sup>CD4<sup>+</sup> or CD3<sup>+</sup>CD8<sup>+</sup>.

Standard ICF assays were followed to identify cytokine-producing T cells as previously described.<sup>5</sup> Mitogenic stimulation drastically reduced CD4 expression therefore CD4 T cells were identified as CD3<sup>+</sup> $\gamma\delta$ <sup>-</sup>CD8<sup>-</sup> and CD8 T cells as CD3<sup>+</sup> $\gamma\delta$ <sup>-</sup>CD8<sup>+</sup> within viable, CD45<sup>+</sup> cells. Specific expression of IFN- $\gamma$ , IL-17 or IL-22 were then determined using isotype controls.

CD1c<sup>+</sup> mDC activation was assessed by evaluating CD40 expression levels with values shown as mean fluorescent intensity (MFI) with background isotype values removed (net MFI). The percentage of cytokine<sup>+</sup> T cells are reported as net values with background isotype staining values removed. For enumeration of DC and T cell frequencies, the percentage of DCs or T cells within viable, CD45<sup>+</sup> cells was converted to an absolute number per gram based on the frequency within viable, CD45<sup>+</sup> cells, initial cell counts and biopsy weights. Similarly, the percent of activated colon CD4 and CD8 T cells as well as the percent of cytokine<sup>+</sup> CD4 and CD8 T cells were also converted to a total number per gram of mucosal tissue.

Supplementary Data, Materials and Methods.  
Dillon *et al.*

**Supplementary Table S2. Antibodies and dyes used in flow cytometry protocols.**

|                                                                          | Company         | Location      |
|--------------------------------------------------------------------------|-----------------|---------------|
| <b>Viable, mononuclear cell identification</b>                           |                 |               |
| PerCpCy5.5 CD45                                                          | eBioscience     | San Diego, CA |
| Aqua Live/Dead Fixable Viability dye                                     | Invitrogen      | Carlsbad, CA  |
| <b>CD1c<sup>+</sup> mDC identification and assessment of activation</b>  |                 |               |
| APC BDCA-1                                                               | Miltenyi Biotec | Auburn, CA    |
| APC mouse IgG2a isotype control                                          |                 |               |
| APC-Cy7 HLA-DR                                                           | BD Biosciences  | San Jose, CA  |
| PE-Cy5 CD11c                                                             | BD Biosciences  |               |
| Biotinylated CD40                                                        | Ancell          | Bayport, MN   |
| Biotinylated mouse IgG1 isotype control                                  |                 |               |
| Streptavidin ECD (PE-Texas Red)                                          | Beckman Coulter | Fullerton, CA |
| <b>Colon T cell identification and assessment of activation</b>          |                 |               |
| eFluor <sup>450</sup> CD3                                                | eBioscience     |               |
| AF700 CD4                                                                | BD Biosciences  |               |
| PE-Cy7 CD8                                                               | BD Biosciences  |               |
| PE $\gamma\delta$ TCR                                                    | BD Biosciences  |               |
| APC-Cy7 HLA-DR                                                           | BD Biosciences  |               |
| AF700 CD38                                                               | eBioscience     |               |
| AF700 mouse IgG1 isotype control                                         |                 |               |
| <b>Blood T cell identification and assessment of activation</b>          |                 |               |
| ECD CD3                                                                  | Beckman Coulter |               |
| PE-Cy7 CD8                                                               | BD Biosciences  |               |
| eFluor <sup>450</sup> CD4                                                | eBioscience     |               |
| APC-Cy7 HLA-DR                                                           | BD Biosciences  |               |
| APC-Cy7 mouse IgG2 isotype control                                       |                 |               |
| AF700 CD38                                                               | eBioscience     |               |
| AF700 mouse IgG1 isotype control                                         |                 |               |
| <b>Colon T cell identification and assessment of cytokine production</b> |                 |               |
| ECD CD3                                                                  | Beckman Coulter |               |
| APC-Cy7 CD4                                                              | BD Biosciences  |               |
| PE-Cy7 CD8                                                               | BD Biosciences  |               |
| PE $\gamma\delta$ TCR                                                    | BD Biosciences  |               |
| AF700 IFN- $\gamma$                                                      | BD Biosciences  |               |
| AF700 mouse IgG1 isotype control                                         |                 |               |
| V <sup>450</sup> IL-17                                                   | BD Biosciences  |               |
| V450 mouse IgG1 isotype control                                          |                 |               |
| PE IL-22                                                                 | eBioscience     |               |
| PE IgG1 isotype control                                                  |                 |               |

**DNA Extraction and Quantification for 16S rRNA sequencing.**

One rectal swab, 250 $\mu$ l of fecal aspirate, or one pre-weighed colon biopsy were vortexed with silicon beads and extracted DNA washed and isolated using the provided filters. Samples were eluted into 50 $\mu$ l of elution buffer, divided into 10 $\mu$ l aliquots and stored at -80°C. Total 16s

rDNA was quantified in all samples by qPCR. The Probe and Primer combination used for amplification of the total 16S rDNA in each sample were: Probe: 5'-/56-FAM/CGT ATT ACC/ZEN/GCG GCK GCT GGC AC/3IABkFQ/-3'; Primer1: 5'-GGA CTA CCA GGG TAT CTA ATC CTG TT-3'; Primer2: 5'-TCC TAC GGG AGG CAG CAG T-3'. Probe, Primers and DNA were mixed with the Taqman Gene Expression Master Mix (ABI) and amplified on a CFX96 Thermocycler (Bio-Rad Laboratories, Hercules, CA) with the following cycler conditions: 56°C 2min, 95°C 8min, 40 cycles of 95°C for 30sec/56°C for 30sec/62°C for 1min with a final elongation step of 62°C for 8min. Sample concentrations were calculated by comparing sample RFUs to a clostridium plasmid eight point standard curve.

### **Analysis of 16S rRNA Sequences**

Illumina paired-end sequencing was performed on the Miseq platform with version 2.0 of the Miseq Control Software, using a 500-cycle version 2 reagent kit. Paired-end reads were sorted by sample via barcodes in the paired reads with a python script. The sorted paired reads were assembled using phrap.<sup>6,7</sup> Assembled sequence ends were trimmed over a moving window of 5 nucleotides until the average quality score met or exceeded 20. Trimmed sequences with more than 1 ambiguity or shorter than 200 nt were discarded. Potential chimeras identified with Uchime (usearch6.0.203\_i86linux32)<sup>8</sup> using the Schloss<sup>9</sup> Silva reference sequences were removed from subsequent analyses. Assembled sequences were aligned and classified with SINA (1.2.11) using the 244,077 bacterial sequences in Silva 111NR<sup>10</sup> as reference configured to yield the Silva taxonomy. Operational taxonomic units (OTUs) were produced by clustering sequences with identical taxonomic assignments. The software package Explicet<sup>11</sup> (v. 2.8.3) was used to display, analyze, and generate figures for microbiome data. Alpha-biodiversity indices (Good's coverage,  $S_{obs}$ ,  $S_{chao1}$ , Shannon Diversity, Shannon Evenness) were estimated using resampling (1000 replicates) of sequence datasets rarified to 10000 reads/sample.<sup>11</sup>

### **Determination of colon tissue viral load.**

To extract total RNA from pre-weighed colon biopsies, samples were mechanically disrupted in 0.6ml of buffer RLT (with addition of Beta-Mercaptoethanol) and homogenized. Subsequently, RNA was extracted according to the manufacturer's instructions, inclusive an incubation with 80  $\mu$ l DNase I (RNase free DNase set, Qiagen) for 30 minutes and finally eluted in 50 $\mu$ l elution buffer.

Using extracted RNA, HIV cDNA was generated using the SuperScript III first-strand synthesis kit (Invitrogen) according to the manufacturers' protocol with specific primer mf302 (PMID: 20116399). HIV RNA was quantified by real-time (RT)-PCR in an ABI 7900HT thermocycler (Applied Biosystems, Foster City, CA) with 0.005 ROX  $\mu$ M dye (Invitrogen) as a passive reference. A total reaction volume of 50  $\mu$ l was added to each well consisting of 5  $\mu$ l of cDNA template, TaqMan Environmental Mastermix 2.0 (Applied Biosystems), PCR primers mf302 and mf299 (1 $\mu$ M each), and probe mf348 (0.3 $\mu$ M) (PMID: 20116399). The PCR conditions were 2 min at 50°C, 10 min at 95°C, and 60 cycles of 15 s at 95°C and 60 s at 60°C. HIV RNA quantification standard was obtained from the DAIDS Virology Quality Assurance (VQA) Program (PMID: 8897167).

Finally, normalization was applied to the cellular input obtained with the housekeeping gene glyceraldehyde phosphate Dehydrogenase (GapDH), as determined by a separate RT-PCR reaction. To account for variation in the number of CD4<sup>+</sup> T cells in different samples, HIV RNA copy numbers were also normalized per CD4 T cell within each biopsy calculated by the percent

## Supplementary Data, Materials and Methods.

Dillon *et al.*

of all viable cells that were CD45<sup>+</sup>CD3<sup>+</sup>CD4<sup>+</sup> (by flow cytometry) and weight of each biopsy and reported as HIV-1 RNA per million CD4 T cell.

**REFERENCES**

- 1 Manuzak, J., Dillon, S. & Wilson, C. Differential interleukin-10 (IL-10) and IL-23 production by human blood monocytes and dendritic cells in response to commensal enteric bacteria. *Clin Vaccine Immunol* **19**, 1207-1217, (2012).
- 2 Dillon, S. M. *et al.* Blood myeloid dendritic cells from HIV-1-infected individuals display a proapoptotic profile characterized by decreased Bcl-2 levels and by caspase-3+ frequencies that are associated with levels of plasma viremia and T cell activation in an exploratory study. *Journal of virology* **85**, 397-409, (2011).
- 3 Dillon, S. M. *et al.* Human intestinal lamina propria CD1c+ dendritic cells display an activated phenotype at steady state and produce IL-23 in response to TLR7/8 stimulation. *J Immunol* **184**, 6612-6621, (2010).
- 4 Smith, P. D. *et al.* Intestinal macrophages and response to microbial encroachment. *Mucosal immunology* **4**, 31-42, (2011).
- 5 Dillon, S. M. *et al.* HIV-1 infection of human intestinal lamina propria CD4+ T cells in vitro is enhanced by exposure to commensal Escherichia coli. *J Immunol* **189**, 885-896, (2012).
- 6 Ewing, B. & Green, P. Base-calling of automated sequencer traces using phred. II. Error probabilities. *Genome research* **8**, 186-194 (1998).
- 7 Ewing, B., Hillier, L., Wendl, M. C. & Green, P. Base-calling of automated sequencer traces using phred. I. Accuracy assessment. *Genome research* **8**, 175-185 (1998).
- 8 Edgar, R. C., Haas, B. J., Clemente, J. C., Quince, C. & Knight, R. UCHIME improves sensitivity and speed of chimera detection. *Bioinformatics* **27**, 2194-2200, (2011).
- 9 Schloss, P. D. & Westcott, S. L. Assessing and improving methods used in operational taxonomic unit-based approaches for 16S rRNA gene sequence analysis. *Applied and environmental microbiology* **77**, 3219-3226, (2011).
- 10 Quast, C. *et al.* The SILVA ribosomal RNA gene database project: improved data processing and web-based tools. *Nucleic acids research* **41**, D590-596, (2013).
- 11 Robertson, C. E. *et al.* Explicet: Graphical user interface software for metadata-driven management, analysis, and visualization of microbiome data. *Bioinformatics*, doi:10.1093/bioinformatics/btt526 (2013).

Division of Infectious Diseases  
 12700 E. 19<sup>th</sup> Avenue, B-168  
 Aurora, Colorado 80045  
 Phone: 303-724-4922  
 Fax: 303-724-4926

**Facsimile Transmittal**

To: NPG (Jason Roberts) From: Stephanie Dillon  
 Fax: 508 276 0594 Date: 11/22/2013  
 Phone: Pages: 3 including coversheet  
 Re: Signed LTP and Artwork/supp. info. cc:

Urgent  For Review  Please Comment  Please Reply  Please Recycle

I have resubmitted a revised version of our manuscript to Mucosal Immunology  
 (Manuscript #: MI-13-297). Here are signed 'License to Publish' and 'Artwork  
 and Supplementary Information Production' forms as requested.

I had faxed a copy of the LTC during the original submission process, but in response  
 to a comment by the reviewer, we have made a minor change to the title and therefore

I have faxed a new LTC.

Please contact me if you have any questions (phone 303 724 4602).

Kind regards,

Stephanie.

**University of Colorado Denver, School of Medicine, Department of Medicine  
 Infectious Diseases Division**

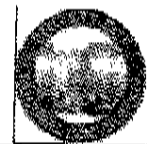

**LICENSE TO PUBLISH**

**Please FAX this completed form to +1 508-276-0594, Attention: Jason Roberts**

**Manuscript #:** MI-13-297 ..... **Mucosal Immunology**

**Title of the contribution:** An altered intestinal mucosal microbiome in HIV-1 infection is associated with mucosal and systemic immune activation and endotoxemia  
 ("the Contribution")

**Author(s):** (names only) SM Dillon, EJ Lee, C Kotter, GL Austin, Z Dong, DK Hecht, B Siewe, DM Smith, AL Landay, DE Robertson, DN Frank and CC Wilson  
 ("the Authors")

**To: The Society for Mucosal Immunology ("SMI")**

1. In consideration of SMI agreeing to publish the Contribution the Authors grant to SMI for the full term of copyright in the Contribution and any extensions thereto, subject to clause 2 below, the exclusive license (a) to publish, reproduce, distribute, display and store the Contribution in all forms, formats and media whether now known or hereafter developed (including without limitation in print, digital and electronic form) throughout the world, (b) to translate the Contribution into other languages, create adaptations, summaries or extracts of the Contribution or other derivative works based on the Contribution and exercise all of the rights set forth in (a) above in such translations, adaptations, summaries, extracts and derivative works and (c) to license others to do any or all of the above.
2. Ownership of copyright remains with the Authors, and provided that, when reproducing the Contribution or extracts from it, the Authors acknowledge first and reference publication in the Journal, the Authors retain the following non-exclusive rights:
  - a) To reproduce the Contribution in whole or in part in any printed volume (book or thesis) of which they are the author(s).
  - b) They and any academic institution where they work at the time may reproduce the Contribution for the purpose of course teaching.
  - c) To post a copy of the Contribution as accepted for publication after peer review (in Word or Tex format) on the Author's own web site, or the Author's institutional repository, or the Author's funding body's archive, six months after publication of the printed or online edition of the Journal, provided that they also link to the Journal article on NPG's web site (eg through the DOI).
  - d) To reuse figures or tables created by them and contained in the Contribution in other works created by them.
3. The Authors warrant and represent that:
  - a) The Authors are the sole authors of and sole owners of the copyright in the Contribution. If the Contribution includes materials of others, the Authors have obtained the permission of the owners of the copyright in all such materials to enable them to grant the rights contained herein. Copies of all such permissions are attached to this license.
  - b) All of the facts contained in the Contribution are true and accurate.
  - c) The Author who has signed this Agreement has full right, power and authority to enter into this Agreement on behalf of all of the Authors.
  - d) Nothing in the Contribution is obscene, defamatory, libelous, violates any right of privacy or infringes any intellectual property rights (including without limitation copyright, patent or trademark) or any other human, personal or other rights of any person or entity or is otherwise unlawful.
  - e) Nothing in the Contribution infringes any duty of confidentiality which any of the Authors may owe to anyone else or violates any contract, express or implied, of any of the Authors, and all of the institutions in which work recorded in the Contribution was carried out have authorized publication of the Contribution.
4. The Authors authorize SMI to take such steps as it considers necessary at its own expense in the Authors' name and on their behalf if it believes that a third party is infringing or is likely to infringe copyright in the Contribution.

This Agreement and the rights and liabilities of the parties with respect to this Agreement and its subject matter, shall be governed by the laws of the State of New York, without reference to the principles of conflicts of laws thereof.

**Signed for and on behalf of the Authors:** Stephanie Dillon ..... **Date:** 11/20/2013

**Please print name:** Stephanie Dillon .....

**Address:** University of Colorado AMC, Medicine-Infectious Diseases, Mail Stop #B168, P-15-11011, 12700 E. 19th Ave. Aurora, CO 80045, USA.



**ARTWORK AND SUPPLEMENTARY INFORMATION PRODUCTION FORM**

This form must be completed for all papers. We are unable to process your paper until we receive instructions concerning artwork and supplementary files.

Please return this form to via fax to: + 1 508 276-0594

Journal: **Mucosal immunology**

Article Title: An altered intestinal mucosal microbiome in HIV-1 infection is associated with mucosal and systemic activation and endotoxemia.

Manuscript Number: MI-13-297

**A. Does Your Article Have Color Artwork for Print Publication?**

No

Yes. I agree to pay the color charges in full and hereby authorize Nature Publishing Group to invoice me for the cost of reproducing color artwork in print. There is no charge for publishing black and white figures.

**Note: The cost for reproducing color artwork in print is \$613 per page. Color figures will be set close to the citation and in the best possible position. Figure re-ordering cannot be undertaken at proof stage to reduce the number of pages featuring color artwork.**

Which figures? (e.g. Figures 1a, 2, 3b)

Figure 1, Figure 3, Figure 4

**B. Do You Have Figures for Reproduction in Color on the Online Full Text HTML Version Only?**

No.

Yes. I am supplying figures for color reproduction for the online full text HTML version. These figures will also be supplied as separate black and white files for the print and online PDF versions.

**Note: There is no charge for reproducing color figures for the online full text HTML version published online. Please note that color will appear in the full text HTML version only, and not in the online PDF version.**

Which figures? (e.g. Figures 1c, 5, 6)

**C. Does Your Article Have Supplementary (online-only) Information?**

No

Yes. I agree to pay the Supplementary Information charges in full and hereby authorize Nature Publishing Group to invoice me for the amount below.

**Note: Supplementary Information is charged at \$125.00 for each file.**

1 file(s) x \$125.00 Total amount: \$125

What material is supplied as Supplementary Information?

Supplementary data, materials and methods

Signature: Stephanie Dillon

Print Name: Stephanie Dillon Date: 11-20-2103

2/11/JM/US/MI
